# Supplementary material for: RNA-seq based transcriptomic analysis uncovers α-linolenic acid and jasmonic acid biosynthesis pathways respond to cold acclimation in Camellia japonica
Source: PubMed Central journal article supplement (PMC5098223; doi:10.1038/srep36463), 2016-11-07
Supplement: srep36463-s1.pdf [file srep36463-s1.pdf]

**RNA-seq based transcriptomic analysis uncovers  $\alpha$ -linolenic acid and jasmonic acid biosynthesis pathways respond to cold acclimation in *Camellia japonica***

Qingyuan Li<sup>1</sup>, Sheng Lei<sup>1,2</sup>, Kebin Du<sup>2</sup>, Xufeng Pang<sup>1,2</sup>, Lizhi Li<sup>1,2</sup>, Zhanchang Wang<sup>1</sup>, Ming Wei<sup>1</sup>, Shao Fu<sup>1</sup>, Limin Hu<sup>3</sup>, and Lin Xu<sup>1\*</sup>

<sup>1</sup> Forestry and Fruit Tree Research Institute, Wuhan Academy of Agricultural Science and Technology, Wuhan 430075, China

<sup>2</sup> College of Horticulture and Forestry Sciences, Huazhong Agricultural University, Wuhan 430070, China

<sup>3</sup> National Key Laboratory of Crop Genetic Improvement, Wuhan 430070, China

\*Correspondence: Lin Xu. *e-mail:* [xulin@wuhanagri.com](mailto:xulin@wuhanagri.com)

**Supplementary information**

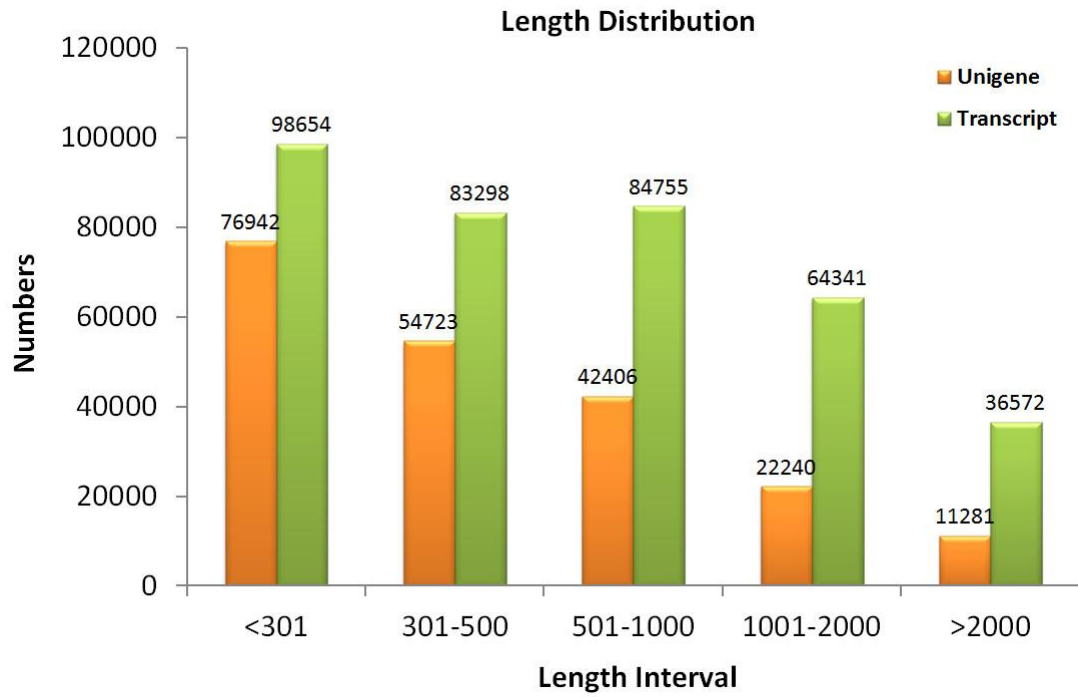

**Supplementary Figure 1. Length distribution of the assembled unigenes.**

### Type I: 13663 genes

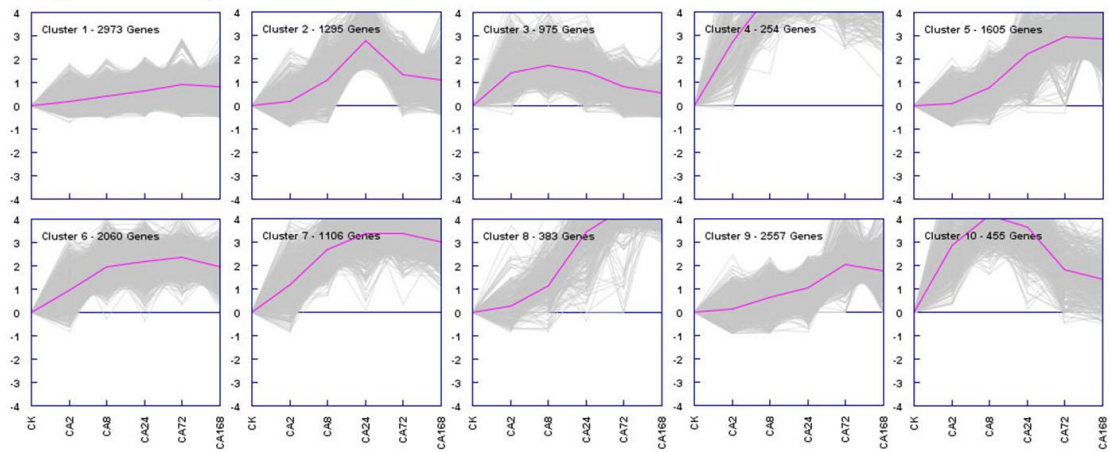

### Type II: 11665 genes

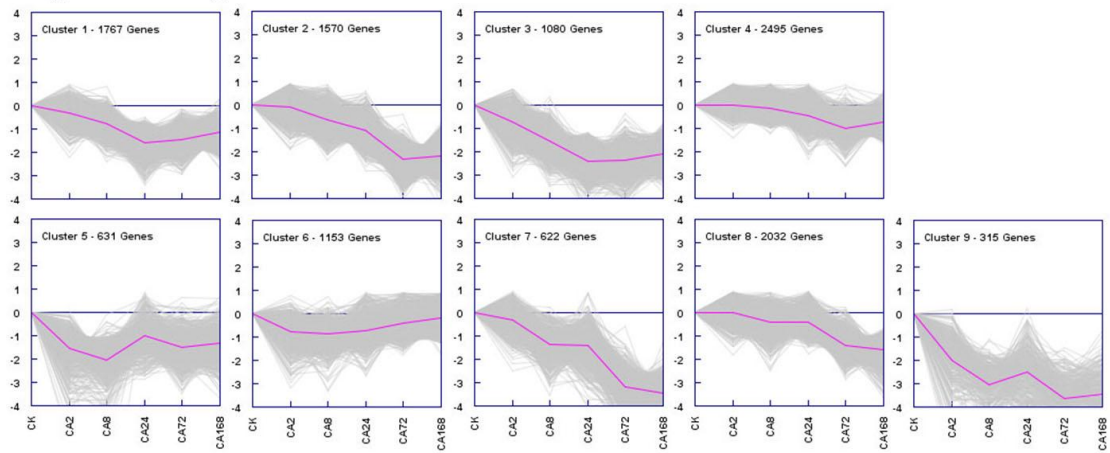

### Type III: 2710 genes

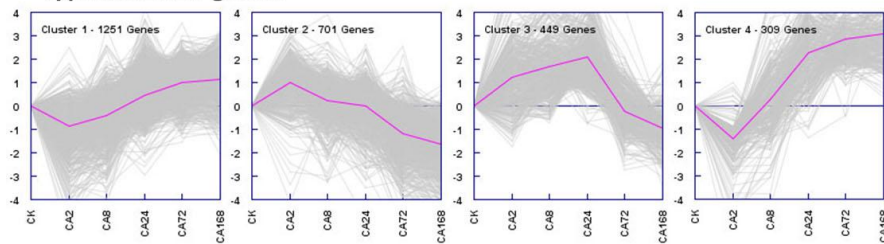

**Supplementary Figure 2. Cluster analysis was developed by the K-means method**

**on the gene expression profiles. CK indicates the non-acclimation control, and CA2,**

**CA8, CA24, CA72 and CA168 refer to 2, 8, 24, 72 and 168 h of cold acclimation.**

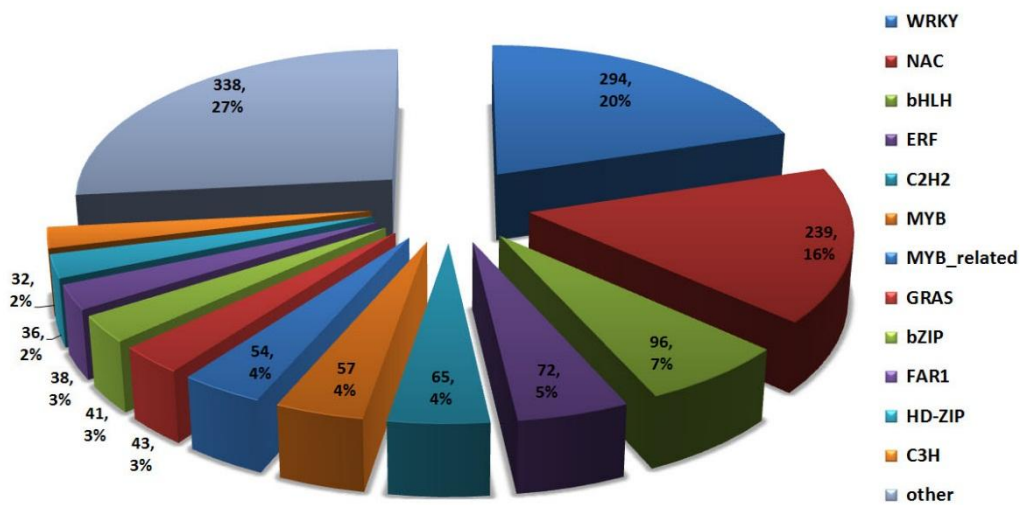

**Supplementary Figure 3. Differentially expressed TF genes and classification of TF families during cold acclimation in *C. japonica*.** TF genes were classified into TF families by using publicly available Arabidopsis TF databases [Plant Transcription Factor Database (PlnTFDB, <http://planttfdb.cbi.pku.edu.cn/index.php>)].

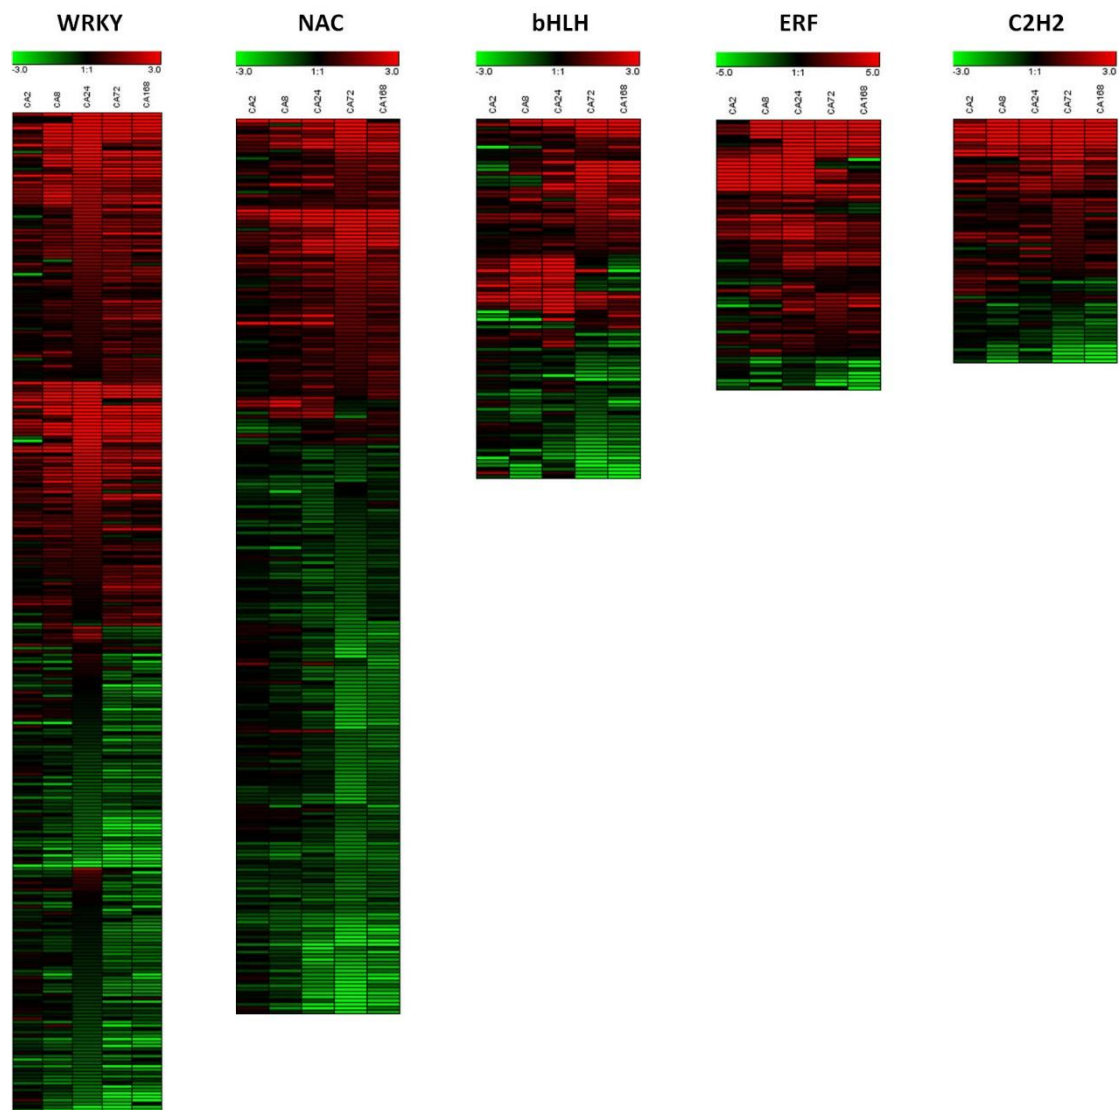

Supplementary Figure 4. Heat maps of the TFs involve in the response to cold acclimation in *C. japonica*.

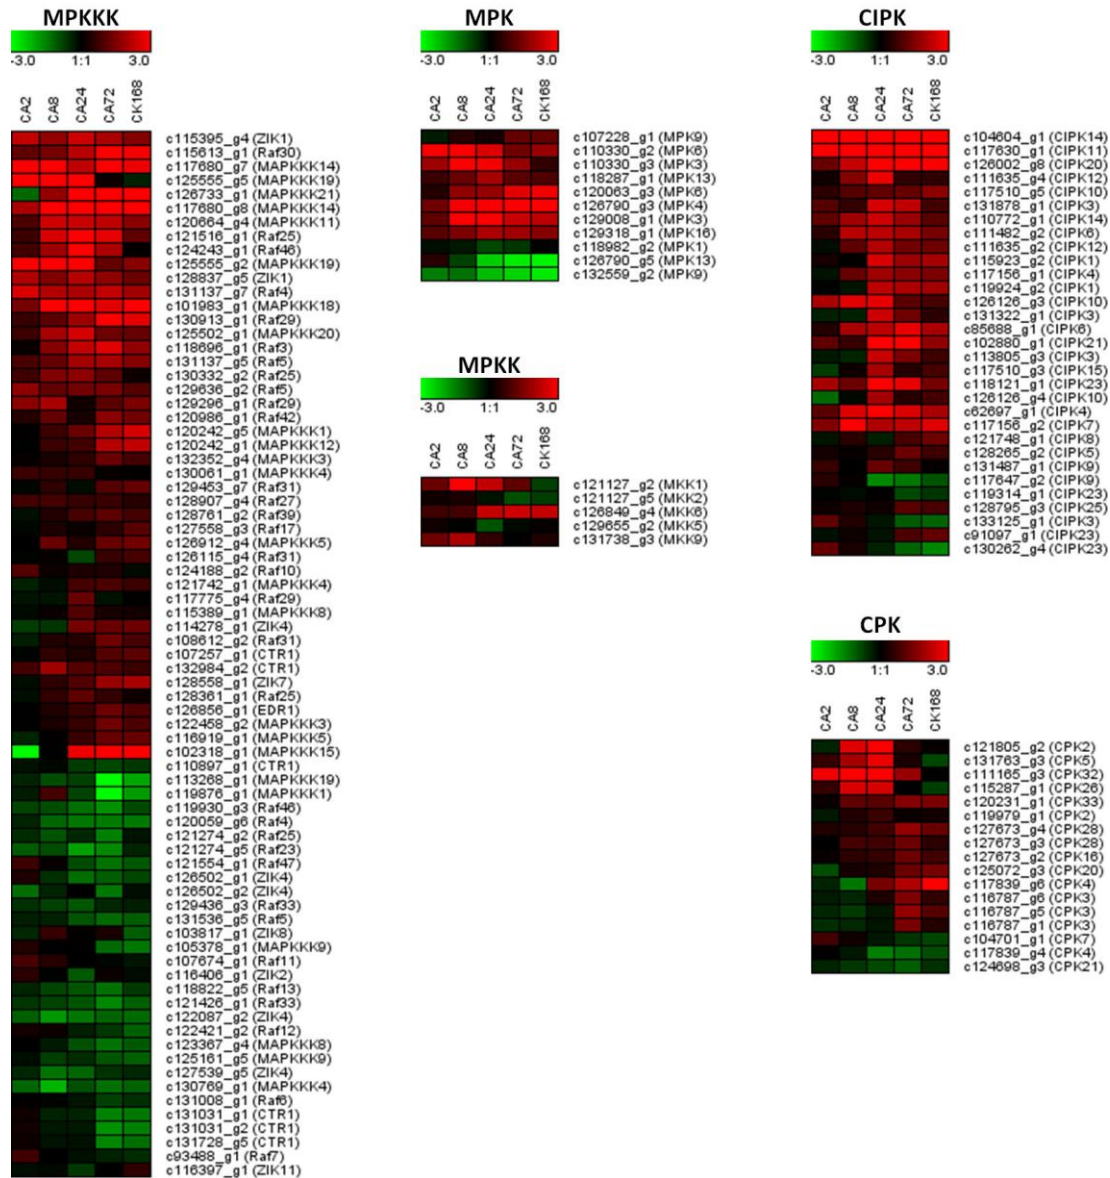

Supplementary Figure 5. Heat maps of the protein kinase involve in the response to cold acclimation in *C. japonica*.

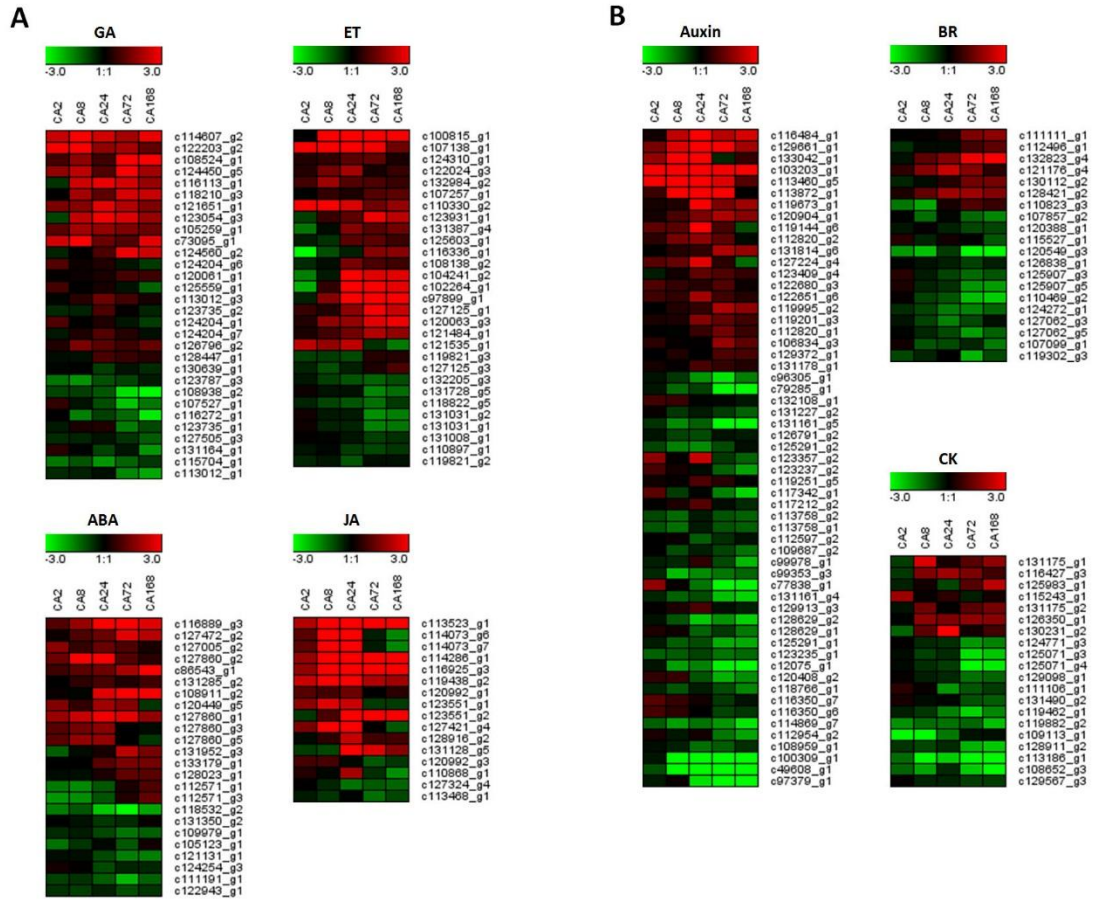

Supplementary Figure 6. Plant hormone signal transduction pathway genes in cold responses in *C. japonica*.

**Supplementary Table 1.** Detailed climatological data from December 1, 2013 to January 9, 2014.

| Year | Month | Date | Average temperature (°C) | Maximum temperature (°C) | Minimum temperature (°C) | Average relative humidity |
|------|-------|------|--------------------------|--------------------------|--------------------------|---------------------------|
| 2013 | 12    | 1    | 6.3                      | 17.2                     | -0.1                     | 76                        |
| 2013 | 12    | 2    | 7.6                      | 19.5                     | 1                        | 80                        |
| 2013 | 12    | 3    | 9.5                      | 18.7                     | 3.2                      | 70                        |
| 2013 | 12    | 4    | 6.8                      | 16.6                     | 1.2                      | 80                        |
| 2013 | 12    | 5    | 8.5                      | 16.6                     | 2                        | 73                        |
| 2013 | 12    | 6    | 5.7                      | 15.7                     | 0.5                      | 78                        |
| 2013 | 12    | 7    | 5.8                      | 17.2                     | -0.7                     | 80                        |
| 2013 | 12    | 8    | 9.2                      | 18.9                     | 2.8                      | 82                        |
| 2013 | 12    | 9    | 9                        | 13.7                     | 3.1                      | 60                        |
| 2013 | 12    | 10   | 4.8                      | 12.1                     | -2.1                     | 67                        |
| 2013 | 12    | 11   | 4.7                      | 12.8                     | -0.4                     | 73                        |
| 2013 | 12    | 12   | 6.8                      | 13.1                     | 0.8                      | 75                        |
| 2013 | 12    | 13   | 5.1                      | 14.9                     | -0.8                     | 76                        |
| 2013 | 12    | 14   | 6.6                      | 13.6                     | 0.5                      | 72                        |
| 2013 | 12    | 15   | 9.4                      | 12.7                     | 6.1                      | 55                        |
| 2013 | 12    | 16   | 7.6                      | 10                       | 6.2                      | 77                        |
| 2013 | 12    | 17   | 6.7                      | 8.3                      | 5.7                      | 78                        |
| 2013 | 12    | 18   | 3.1                      | 9.5                      | -1.2                     | 77                        |
| 2013 | 12    | 19   | 1.2                      | 7.6                      | -3.1                     | 84                        |
| 2013 | 12    | 20   | 2.7                      | 9                        | -1.8                     | 75                        |
| 2013 | 12    | 21   | 0.2                      | 7.8                      | -4                       | 77                        |
| 2013 | 12    | 22   | -0.4                     | 8.1                      | -5.5                     | 77                        |
| 2013 | 12    | 23   | 0.6                      | 10.1                     | -4.5                     | 74                        |
| 2013 | 12    | 24   | 1.3                      | 10.9                     | -4.2                     | 73                        |
| 2013 | 12    | 25   | 2.7                      | 10.5                     | -2.9                     | 71                        |
| 2013 | 12    | 26   | 4                        | 8.7                      | 0.5                      | 52                        |
| 2013 | 12    | 27   | -1.9                     | 5.9                      | -6.8                     | 59                        |
| 2013 | 12    | 28   | -1.4                     | 8.7                      | -6.9                     | 68                        |
| 2013 | 12    | 29   | 0.5                      | 10.3                     | -6.3                     | 68                        |
| 2013 | 12    | 30   | 2.3                      | 13                       | -4.6                     | 69                        |
| 2013 | 12    | 31   | 3.7                      | 15.8                     | -4                       | 76                        |
| 2014 | 1     | 1    | 4.4                      | 17.9                     | -2.6                     | 74                        |
| 2014 | 1     | 2    | 4.4                      | 15.5                     | -2.5                     | 75                        |
| 2014 | 1     | 3    | 6                        | 16.2                     | -1                       | 64                        |
| 2014 | 1     | 4    | 4.5                      | 16                       | -1.1                     | 62                        |
| 2014 | 1     | 5    | 4.1                      | 16.1                     | -3.5                     | 66                        |
| 2014 | 1     | 6    | 6.9                      | 10.2                     | 2.9                      | 67                        |
| 2014 | 1     | 7    | 5.4                      | 6.2                      | 5                        | 93                        |
| 2014 | 1     | 8    | 4.7                      | 7.8                      | 1.2                      | 82                        |
| 2014 | 1     | 9    | 1.7                      | 8.8                      | -2.3                     | 85                        |



**Supplementary Table 2.** Output quality of RNA-seq data.

| Sample  | Total raw Reads | Total clean reads | Total clean bases (Gb) | Error(%) | Q20(%) | Q30(%) | GC(%) |
|---------|-----------------|-------------------|------------------------|----------|--------|--------|-------|
| CK1     | 58,712,214      | 57,304,692        | 7.16                   | 0.01     | 97.01  | 92.61  | 45.34 |
| CK2     | 54,782,480      | 53,739,050        | 6.72                   | 0.01     | 97.38  | 93.44  | 44.77 |
| CK3     | 56,293,082      | 55,159,582        | 6.89                   | 0.01     | 97.39  | 93.41  | 45.16 |
| L2H1    | 56,298,426      | 55,208,138        | 6.90                   | 0.01     | 97.45  | 93.54  | 45.00 |
| L2H2    | 57,536,202      | 56,334,842        | 7.04                   | 0.01     | 97.37  | 93.38  | 45.29 |
| L2H3    | 69,672,862      | 68,363,006        | 8.55                   | 0.01     | 97.31  | 93.22  | 44.86 |
| L8H1    | 55,584,540      | 54,255,022        | 6.78                   | 0.02     | 96.83  | 92.17  | 44.92 |
| L8H2    | 61,807,074      | 60,369,222        | 7.55                   | 0.01     | 97.41  | 93.49  | 45.17 |
| L8H3    | 53,608,804      | 52,141,292        | 6.52                   | 0.01     | 97.15  | 92.97  | 45.41 |
| L24H1   | 56,614,676      | 55,071,386        | 6.88                   | 0.01     | 97.24  | 93.38  | 44.91 |
| L24H2   | 54,395,750      | 52,965,996        | 6.62                   | 0.01     | 97.29  | 93.51  | 45.06 |
| L24H3   | 72,436,378      | 70,155,874        | 8.77                   | 0.01     | 97.38  | 93.70  | 44.89 |
| L72H1   | 53,759,510      | 52,739,760        | 6.59                   | 0.01     | 96.86  | 92.29  | 45.00 |
| L72H2   | 56,945,598      | 55,488,212        | 6.94                   | 0.01     | 97.41  | 93.59  | 45.14 |
| L72H3   | 55,365,328      | 54,088,014        | 6.76                   | 0.01     | 97.14  | 93.04  | 44.58 |
| L168H1  | 49,554,492      | 48,294,164        | 6.04                   | 0.01     | 97.32  | 93.57  | 44.49 |
| L168H2  | 48,952,616      | 47,472,532        | 5.93                   | 0.01     | 97.25  | 93.48  | 44.83 |
| L168H3  | 59,073,324      | 57,569,684        | 7.20                   | 0.01     | 97.33  | 93.60  | 44.49 |
| Total   | 1,031,393,356   | 1,006,720,468     | 125.84                 | -        | -      | -      | -     |
| Average | 57,299,631      | 55,928,915        | 6.99                   | 0.01     | 97.25  | 93.24  | 44.96 |

**Supplementary Table 3.** Summary of length distribution.

|             | <b>Min length<br/>(bp)</b> | <b>Mean length<br/>(bp)</b> | <b>Median length<br/>(bp)</b> | <b>Max length<br/>(bp)</b> | <b>N50 (bp)</b> | <b>N90 (bp)</b> | <b>Total</b> |
|-------------|----------------------------|-----------------------------|-------------------------------|----------------------------|-----------------|-----------------|--------------|
| Transcripts | 201                        | 860                         | 507                           | 14487                      | 1415            | 343             | 367,620      |
| Unigenes    | 201                        | 644                         | 374                           | 14487                      | 951             | 265             | 207,592      |

**Supplementary Table 4.** Summary of unigenes annotation.

|                                    | <b>Number of<br/>Unigenes</b> | <b>Percentage<br/>(%)</b> |
|------------------------------------|-------------------------------|---------------------------|
| Annotated in NR                    | 65150                         | 31.38                     |
| Annotated in NT                    | 44101                         | 21.24                     |
| Annotated in SwissProt             | 47011                         | 22.64                     |
| Annotated in PFAM                  | 48079                         | 23.16                     |
| Annotated in GO                    | 48916                         | 23.56                     |
| Annotated in KOG                   | 23514                         | 11.32                     |
| Annotated in all Databases         | 10170                         | 4.89                      |
| Annotated in at least one Database | 84910                         | 40.9                      |
| Total Unigenes                     | 207592                        | 100                       |

**Supplementary Table 6.** CPK, CIPK, MPK, MPKK and MPKKK genes were identified in the *C. japonica* genome according to the homologous genes in *Arabidopsis*.

| Gene ID    | <i>A. thaliana</i> orthologue | Gene name | BlastP E-value | Gene family                                      |
|------------|-------------------------------|-----------|----------------|--------------------------------------------------|
| c119979_g1 | AT3G10660                     | CPK2      | 0              | Calcium dependent protein kinase                 |
| c121805_g2 | AT3G10660                     | CPK2      | 2.00E-96       | Calcium dependent protein kinase                 |
| c116787_g6 | AT4G23650                     | CPK3      | 1.00E-19       | Calcium dependent protein kinase                 |
| c116787_g5 | AT4G23650                     | CPK3      | 3.00E-45       | Calcium dependent protein kinase                 |
| c116787_g1 | AT4G23650                     | CPK3      | 7.00E-82       | Calcium dependent protein kinase                 |
| c117839_g6 | AT4G09570                     | CPK4      | 2.00E-173      | Calcium dependent protein kinase                 |
| c117839_g4 | AT4G09570                     | CPK4      | 5.00E-41       | Calcium dependent protein kinase                 |
| c131763_g3 | AT4G35310                     | CPK5      | 1.00E-48       | Calcium dependent protein kinase                 |
| c104701_g1 | AT5G12480                     | CPK7      | 8.00E-35       | Calcium dependent protein kinase                 |
| c127673_g2 | AT2G17890                     | CPK16     | 9.00E-56       | Calcium dependent protein kinase                 |
| c125072_g3 | AT2G38910                     | CPK20     | 0              | Calcium dependent protein kinase                 |
| c124698_g3 | AT4G04720                     | CPK21     | 1.00E-157      | Calcium dependent protein kinase                 |
| c115287_g1 | AT4G38230                     | CPK26     | 1.00E-15       | Calcium dependent protein kinase                 |
| c127673_g3 | AT5G66210                     | CPK28     | 9.00E-82       | Calcium dependent protein kinase                 |
| c127673_g4 | AT5G66210                     | CPK28     | 2.00E-51       | Calcium dependent protein kinase                 |
| c111165_g3 | AT3G57530                     | CPK32     | 4.00E-12       | Calcium dependent protein kinase                 |
| c120231_g1 | AT1G50700                     | CPK33     | 2.00E-89       | Calcium dependent protein kinase                 |
| c119924_g2 | AT3G17510                     | CIPK1     | 3.00E-12       | CBL-interacting serine-threonine protein kinases |
| c115923_g2 | AT3G17510                     | CIPK1     | 1.00E-161      | CBL-interacting serine-threonine protein kinases |
| c133125_g1 | AT2G26980                     | CIPK3     | 2.00E-128      | CBL-interacting serine-threonine protein kinases |
| c113805_g3 | AT2G26980                     | CIPK3     | 7.00E-53       | CBL-interacting serine-threonine protein kinases |
| c131322_g1 | AT2G26980                     | CIPK3     | 8.00E-123      | CBL-interacting serine-threonine protein kinases |
| c131878_g1 | AT2G26980                     | CIPK3     | 3.00E-98       | CBL-interacting serine-threonine protein kinases |
| c62697_g1  | AT4G14580                     | CIPK4     | 1.00E-22       | CBL-interacting serine-threonine protein kinases |
| c117156_g1 | AT4G14580                     | CIPK4     | 7.00E-77       | CBL-interacting serine-threonine protein kinases |
| c128265_g2 | AT5G10930                     | CIPK5     | 2.00E-82       | CBL-interacting serine-threonine protein kinases |
| c111482_g2 | AT4G30960                     | CIPK6     | 0              | CBL-interacting serine-threonine protein kinases |
| c85688_g1  | AT4G30960                     | CIPK6     | 1.00E-33       | CBL-interacting serine-threonine protein kinases |
| c117156_g2 | AT3G23000                     | CIPK7     | 1.00E-128      | CBL-interacting serine-threonine protein kinases |
| c121748_g1 | AT4G24400                     | CIPK8     | 1.00E-147      | CBL-interacting serine-threonine protein kinases |
| c131487_g1 | AT1G01140                     | CIPK9     | 2.00E-136      | CBL-interacting serine-threonine protein kinases |
| c117647_g2 | AT1G01140                     | CIPK9     | 2.00E-12       | CBL-interacting serine-threonine protein kinases |
| c117510_g5 | AT5G58380                     | CIPK10    | 8.00E-79       | CBL-interacting serine-threonine protein kinases |
| c126126_g4 | AT5G58380                     | CIPK10    | 4.00E-148      | CBL-interacting serine-threonine protein kinases |
| c126126_g3 | AT5G58380                     | CIPK10    | 0              | CBL-interacting serine-threonine protein kinases |
| c117630_g1 | AT2G30360                     | CIPK11    | 9.00E-164      | CBL-interacting serine-threonine protein kinases |
| c111635_g2 | AT4G18700                     | CIPK12    | 4.00E-121      | CBL-interacting serine-threonine protein kinases |
| c111635_g4 | AT4G18700                     | CIPK12    | 6.00E-114      | CBL-interacting serine-threonine protein kinases |
| c110772_g1 | AT5G01820                     | CIPK14    | 2.00E-176      | CBL-interacting serine-threonine protein kinases |
| c104604_g1 | AT5G01820                     | CIPK14    | 2.00E-83       | CBL-interacting serine-threonine protein kinases |
| c117510_g3 | AT5G01810                     | CIPK15    | 1.00E-65       | CBL-interacting serine-threonine protein kinases |
| c126002_g8 | AT5G45820                     | CIPK20    | 0              | CBL-interacting serine-threonine protein kinases |
| c102880_g1 | AT5G57630                     | CIPK21    | 4.00E-13       | CBL-interacting serine-threonine protein kinases |
| c119314_g1 | AT1G30270                     | CIPK23    | 3.00E-23       | CBL-interacting serine-threonine protein kinases |

|            |           |          |           |                                                  |
|------------|-----------|----------|-----------|--------------------------------------------------|
| c130262_g4 | AT1G30270 | CIPK23   | 6.00E-30  | CBL-interacting serine-threonine protein kinases |
| c91097_g1  | AT1G30270 | CIPK23   | 8.00E-26  | CBL-interacting serine-threonine protein kinases |
| c118121_g1 | AT1G30270 | CIPK23   | 2.00E-26  | CBL-interacting serine-threonine protein kinases |
| c128795_g3 | AT5G25110 | CIPK25   | 0         | CBL-interacting serine-threonine protein kinases |
| c118982_g2 | AT1G10210 | MPK1     | 0         | MAP kinase gene family                           |
| c110330_g3 | AT3G45640 | MPK3     | 8.00E-22  | MAP kinase gene family                           |
| c129008_g1 | AT3G45640 | MPK3     | 1.00E-145 | MAP kinase gene family                           |
| c126790_g3 | AT4G01370 | MPK4     | 1.00E-20  | MAP kinase gene family                           |
| c120063_g3 | AT2G43790 | MPK6     | 4.00E-20  | MAP kinase gene family                           |
| c110330_g2 | AT2G43790 | MPK6     | 6.00E-17  | MAP kinase gene family                           |
| c107228_g1 | AT3G18040 | MPK9     | 2.00E-14  | MAP kinase gene family                           |
| c132559_g2 | AT3G18040 | MPK9     | 3.00E-35  | MAP kinase gene family                           |
| c126790_g5 | AT1G07880 | MPK13    | 1.00E-24  | MAP kinase gene family                           |
| c118287_g1 | AT1G07880 | MPK13    | 1.00E-107 | MAP kinase gene family                           |
| c129318_g1 | AT5G19010 | MPK16    | 4.00E-110 | MAP kinase gene family                           |
| c121127_g2 | AT4G26070 | MKK1     | 3.00E-13  | MAP kinase kinase gene family                    |
| c121127_g5 | AT4G29810 | MKK2     | 2.00E-148 | MAP kinase kinase gene family                    |
| c129655_g2 | AT3G21220 | MKK5     | 3.00E-75  | MAP kinase kinase gene family                    |
| c126849_g4 | AT5G56580 | MKK6     | 1.00E-141 | MAP kinase kinase gene family                    |
| c131738_g3 | AT1G73500 | MKK9     | 3.00E-122 | MAP kinase kinase gene family                    |
| c120242_g5 | AT1G09000 | MAPKKK1  | 2.00E-12  | MAP kinase kinase kinase gene family             |
| c119876_g1 | AT1G09000 | MAPKKK1  | 9.00E-87  | MAP kinase kinase kinase gene family             |
| c122458_g2 | AT1G53570 | MAPKKK3  | 1.00E-77  | MAP kinase kinase kinase gene family             |
| c132352_g4 | AT1G53570 | MAPKKK3  | 1.00E-85  | MAP kinase kinase kinase gene family             |
| c130061_g1 | AT1G63700 | MAPKKK4  | 3.00E-105 | MAP kinase kinase kinase gene family             |
| c121742_g1 | AT1G63700 | MAPKKK4  | 6.00E-79  | MAP kinase kinase kinase gene family             |
| c130769_g1 | AT1G63700 | MAPKKK4  | 3.00E-39  | MAP kinase kinase kinase gene family             |
| c126912_g4 | AT5G66850 | MAPKKK5  | 3.00E-53  | MAP kinase kinase kinase gene family             |
| c116919_g1 | AT5G66850 | MAPKKK5  | 6.00E-176 | MAP kinase kinase kinase gene family             |
| c123367_g4 | AT4G08500 | MAPKKK8  | 9.00E-16  | MAP kinase kinase kinase gene family             |
| c115389_g1 | AT4G08500 | MAPKKK8  | 3.00E-35  | MAP kinase kinase kinase gene family             |
| c105378_g1 | AT4G08480 | MAPKKK9  | 2.00E-21  | MAP kinase kinase kinase gene family             |
| c125161_g5 | AT4G08480 | MAPKKK9  | 6.00E-13  | MAP kinase kinase kinase gene family             |
| c120664_g4 | AT4G12020 | MAPKKK11 | 7.00E-39  | MAP kinase kinase kinase gene family             |
| c120242_g1 | AT3G06030 | MAPKKK12 | 9.00E-165 | MAP kinase kinase kinase gene family             |
| c117680_g7 | AT2G30040 | MAPKKK14 | 2.00E-115 | MAP kinase kinase kinase gene family             |
| c117680_g8 | AT2G30040 | MAPKKK14 | 6.00E-124 | MAP kinase kinase kinase gene family             |
| c102318_g1 | AT5G55090 | MAPKKK15 | 5.00E-106 | MAP kinase kinase kinase gene family             |
| c101983_g1 | AT1G05100 | MAPKKK18 | 1.00E-108 | MAP kinase kinase kinase gene family             |
| c125555_g2 | AT5G67080 | MAPKKK19 | 1.00E-83  | MAP kinase kinase kinase gene family             |
| c125555_g5 | AT5G67080 | MAPKKK19 | 5.00E-115 | MAP kinase kinase kinase gene family             |
| c125502_g1 | AT3G50310 | MAPKKK20 | 9.00E-74  | MAP kinase kinase kinase gene family             |
| c126733_g1 | AT4G36950 | MAPKKK21 | 2.00E-66  | MAP kinase kinase kinase gene family             |
| c115395_g4 | AT3G51630 | ZIK1     | 2.00E-17  | MAP kinase kinase kinase gene family             |
| c128837_g5 | AT3G51630 | ZIK1     | 6.00E-169 | MAP kinase kinase kinase gene family             |
| c116406_g1 | AT5G58350 | ZIK2     | 4.00E-39  | MAP kinase kinase kinase gene family             |
| c126502_g2 | AT3G04910 | ZIK4     | 6.00E-121 | MAP kinase kinase kinase gene family             |
| c122087_g2 | AT3G04910 | ZIK4     | 4.00E-77  | MAP kinase kinase kinase gene family             |

|            |           |       |           |                                      |
|------------|-----------|-------|-----------|--------------------------------------|
| c114278_g1 | AT3G04910 | ZIK4  | 1.00E-65  | MAP kinase kinase kinase gene family |
| c126502_g1 | AT3G04910 | ZIK4  | 7.00E-70  | MAP kinase kinase kinase gene family |
| c127539_g5 | AT3G04910 | ZIK4  | 1.00E-95  | MAP kinase kinase kinase gene family |
| c128558_g1 | AT1G49160 | ZIK7  | 7.00E-16  | MAP kinase kinase kinase gene family |
| c103817_g1 | AT5G55560 | ZIK8  | 8.00E-176 | MAP kinase kinase kinase gene family |
| c116397_g1 | AT3G48260 | ZIK11 | 0         | MAP kinase kinase kinase gene family |
| c110897_g1 | AT5G03730 | CTR1  | 9.00E-65  | MAP kinase kinase kinase gene family |
| c131728_g5 | AT5G03730 | CTR1  | 5.00E-23  | MAP kinase kinase kinase gene family |
| c131031_g1 | AT5G03730 | CTR1  | 9.00E-62  | MAP kinase kinase kinase gene family |
| c131031_g2 | AT5G03730 | CTR1  | 5.00E-65  | MAP kinase kinase kinase gene family |
| c132984_g2 | AT5G03730 | CTR1  | 1.00E-148 | MAP kinase kinase kinase gene family |
| c107257_g1 | AT5G03730 | CTR1  | 3.00E-26  | MAP kinase kinase kinase gene family |
| c126856_g1 | AT1G08720 | EDR1  | 5.00E-31  | MAP kinase kinase kinase gene family |
| c118696_g1 | AT5G11850 | Raf3  | 3.00E-19  | MAP kinase kinase kinase gene family |
| c131137_g7 | AT1G18160 | Raf4  | 2.00E-11  | MAP kinase kinase kinase gene family |
| c120059_g6 | AT1G18160 | Raf4  | 1.00E-26  | MAP kinase kinase kinase gene family |
| c131536_g5 | AT1G73660 | Raf5  | 3.00E-29  | MAP kinase kinase kinase gene family |
| c129636_g2 | AT1G73660 | Raf5  | 0         | MAP kinase kinase kinase gene family |
| c131137_g5 | AT1G73660 | Raf5  | 1.00E-12  | MAP kinase kinase kinase gene family |
| c131008_g1 | AT4G24480 | Raf6  | 7.00E-40  | MAP kinase kinase kinase gene family |
| c93488_g1  | AT3G06620 | Raf7  | 3.00E-56  | MAP kinase kinase kinase gene family |
| c124188_g2 | AT5G49470 | Raf10 | 5.00E-15  | MAP kinase kinase kinase gene family |
| c107674_g1 | AT1G67890 | Raf11 | 2.00E-21  | MAP kinase kinase kinase gene family |
| c122421_g2 | AT4G23050 | Raf12 | 6.00E-88  | MAP kinase kinase kinase gene family |
| c118822_g5 | AT2G31010 | Raf13 | 2.00E-103 | MAP kinase kinase kinase gene family |
| c127558_g3 | AT1G14000 | Raf17 | 1.00E-144 | MAP kinase kinase kinase gene family |
| c121274_g5 | AT2G31800 | Raf23 | 2.00E-37  | MAP kinase kinase kinase gene family |
| c121516_g1 | AT2G43850 | Raf25 | 2.00E-13  | MAP kinase kinase kinase gene family |
| c121274_g2 | AT2G43850 | Raf25 | 6.00E-33  | MAP kinase kinase kinase gene family |
| c130332_g2 | AT2G43850 | Raf25 | 7.00E-21  | MAP kinase kinase kinase gene family |
| c128361_g1 | AT2G43850 | Raf25 | 6.00E-53  | MAP kinase kinase kinase gene family |
| c128907_g4 | AT4G18950 | Raf27 | 0         | MAP kinase kinase kinase gene family |
| c130913_g1 | AT4G35780 | Raf29 | 6.00E-24  | MAP kinase kinase kinase gene family |
| c129296_g1 | AT4G35780 | Raf29 | 2.00E-47  | MAP kinase kinase kinase gene family |
| c117775_g4 | AT4G35780 | Raf29 | 4.00E-14  | MAP kinase kinase kinase gene family |
| c115613_g1 | AT4G38470 | Raf30 | 9.00E-78  | MAP kinase kinase kinase gene family |
| c126115_g4 | AT5G01850 | Raf31 | 1.00E-68  | MAP kinase kinase kinase gene family |
| c108612_g2 | AT5G01850 | Raf31 | 4.00E-17  | MAP kinase kinase kinase gene family |
| c129453_g7 | AT5G01850 | Raf31 | 7.00E-23  | MAP kinase kinase kinase gene family |
| c121426_g1 | AT5G50000 | Raf33 | 1.00E-105 | MAP kinase kinase kinase gene family |
| c129436_g3 | AT5G50000 | Raf33 | 8.00E-107 | MAP kinase kinase kinase gene family |
| c128761_g2 | AT3G22750 | Raf39 | 0         | MAP kinase kinase kinase gene family |
| c120986_g1 | AT3G46920 | Raf42 | 3.00E-30  | MAP kinase kinase kinase gene family |
| c119930_g3 | AT3G59830 | Raf46 | 2.00E-67  | MAP kinase kinase kinase gene family |
| c124243_g1 | AT3G59830 | Raf46 | 5.00E-69  | MAP kinase kinase kinase gene family |
| c121554_g1 | AT3G58760 | Raf47 | 2.00E-97  | MAP kinase kinase kinase gene family |

---

**Supplementary Table 8.** List of primers used in qPCR assays.

| Primer  | Sequence (5' to 3')       | Gene ID     |
|---------|---------------------------|-------------|
| LQP2025 | CCCTTCATTTCCCATCCGA       | c124803_g2  |
| LQP2026 | CCAGTGAGGAGAGGACCATTGT    | c124803_g2  |
| LQP2029 | TCATAATAGACGCCACGACTCA    | c121153_g2  |
| LQP2030 | TTACAACAGCAATCACCCCG      | c121153_g2  |
| LQP2031 | GGCGATGAAAGCCGACGA        | c114675_g1  |
| LQP2032 | TCCGATTCCGAGACCACCG       | c114675_g1  |
| LQP2033 | GCCAACTGCTTGATGCTCCT      | c128585_g1  |
| LQP2034 | CTCGTGGGTCTTCCCCTTTA      | c128585_g1  |
| LQP2035 | CGCCGCAGCAACAACC          | c115655_g1  |
| LQP2036 | ATCGGGAAGTGGGAATAGAGG     | c115655_g1  |
| LQP2037 | AGGGTTGGGATGTTTCTTGG      | c121292_g2  |
| LQP2038 | CTCTGTCTCGTCCCCGTCTC      | c121292_g2  |
| LQP2039 | AGCAGAAGAAGTGAAGAGGCATTA  | c120062_g5  |
| LQP2040 | TCCTGTAGTTTGGGTAGGGCAC    | c120062_g5  |
| LQP2041 | GCAGACGAGTTGAGCAAAGAT     | c127146_g10 |
| LQP2042 | CATTGGCAAGTGGGTCATACA     | c127146_g10 |
| LQP2045 | CTCTTGACCATTGACAACTGATA   | c113712_g2  |
| LQP2046 | AAACCTTGCCTTGCTTAGTGC     | c113712_g2  |
| LQP2049 | GCTGCTCATAAGCCCTCCTG      | c131064_g2  |
| LQP2050 | GATGCTGTTGGCACTCTTGTTT    | c131064_g2  |
| LQP2051 | TCAATCAGCACATAAATCTTACTCC | c124648_g2  |
| LQP2052 | CCCCATCCTGCTAAGGTCAT      | c124648_g2  |
| LQP2053 | TGGTGGGTAGATGTTTGTGGG     | c115468_g1  |
| LQP2054 | CATTTTCGCAGGCAGGGA        | c115468_g1  |
| LQP2055 | TCCTCTGCTGCCTCCTTCG       | c119977_g1  |
| LQP2056 | TTTTCTTCTCCACAAACCCC      | c119977_g1  |
| LQP2057 | TGGAAGCGAAGTGAAGGGAAG     | c116938_g4  |
| LQP2058 | GGTTTTACCATATCATTGGGAGC   | c116938_g4  |
| LQP2059 | GGCTTTCCTCGGGTTCA         | c122550_g5  |
| LQP2060 | TGGTGCTGTGAAGCGGGT        | c122550_g5  |
| LQP2063 | CCGAGGCAACAACTGGCT        | c122240_g2  |
| LQP2064 | CGAGACCGTATGCGAATAGGAG    | c122240_g2  |
| LQP2065 | AACAAGTGGTGGGTGGCATT      | c115110_g2  |
| LQP2066 | CCGTGGCGAGCAGAAAAC        | c115110_g2  |
| LQP2067 | TAGACTCCGAGCCGCTGTGTA     | c122860_g4  |
| LQP2068 | GCCAGCCCACTTGATGTATGA     | c122860_g4  |
| LQP2069 | GTTGTCTTAGGCTCAAGGCTCAC   | c117148_g2  |
| LQP2070 | GGACTCCTCATCTTCACTACCGT   | c117148_g2  |
| LQP2071 | ATGCCGTTGATGAAATCCGTA     | c119308_g2  |
| LQP2072 | CAAAGGCTGCGTCGTGAGA       | c119308_g2  |
| LQP2073 | AACCCCTCCCTTCAACCC        | c130291_g3  |
| LQP2074 | GAGCCCTTAATTTACGACACTG    | c130291_g3  |
| LQP2075 | GCAGGGGAAATGGAGTGGAC      | c126366_g3  |
| LQP2076 | CAATGAAGCCGTGCTAAAGGA     | c126366_g3  |
| LQP2077 | GGCTTCCACGGTCTCGCT        | c122188_g1  |

|         |                            |            |
|---------|----------------------------|------------|
| LQP2078 | TCCAACCCCTTTTCTCCC         | c122188_g1 |
| LQP2079 | CCGTCGCAATAGGTCCAGGC       | c132434_g1 |
| LQP2080 | GAGGCGGAGGAGGGAGAATCA      | c132434_g1 |
| LQP2081 | AGGAATGGAGTTATCTGCGAGG     | c129820_g1 |
| LQP2082 | TGGTAGTGTGGGATTTGAGGG      | c129820_g1 |
| LQP2083 | GCCACCATTGACACGAACGA       | c126650_g5 |
| LQP2084 | CGGGAATCACCGCTAACTGC       | c126650_g5 |
| LQP2087 | CGCTGACAACATCTCGTCCATT     | c117770_g1 |
| LQP2088 | CGACACGGCGACTCTGCTT        | c117770_g1 |
| LQP2089 | AGCCACTATTCCCAACTTCACTAA   | c89308_g1  |
| LQP2090 | AAAAAATACACGAACACCGAAAA    | c89308_g1  |
| LQP2091 | TTGCCAGCATTGGATGTTTC       | c85245_g1  |
| LQP2092 | TTGTCATTATTGGAGCGATTTCT    | c85245_g1  |
| LQP2093 | TGTTTACCACCAAGTACAGGAC     | c130874_g2 |
| LQP2094 | GGGTTGAAGAGGCTACGAGAGA     | c130874_g2 |
| LQP2097 | CTAAATCCTCGGACTTATCGGG     | c127824_g5 |
| LQP2098 | TTACCAGCACAAACACCACCTG     | c127824_g5 |
| LQP2099 | CCGCTGAGCAACGGATGA         | c122860_g2 |
| LQP2100 | TGCCAAGGAGCACGGAGAC        | c122860_g2 |
| LQP2101 | CCGCCGAATCTGACTGCT         | c119918_g1 |
| LQP2102 | CAAACCTCCCCTCTTTCCCACT     | c119918_g1 |
| LQP2105 | CTTGGCAGGGGAGAAAGATG       | c114797_g1 |
| LQP2106 | AGCAACAGGCAACTGAGCG        | c114797_g1 |
| LQP2107 | GTGAATGGGTTTCTTGTGCTGA     | c128426_g1 |
| LQP2108 | GGCTTTATTGCTTTTGTGGCTT     | c128426_g1 |
| LQP2043 | TCTCAACCATAAACGATGCCGACCAG | Cj18S RNA  |
| LQP2044 | TTTCAGCCTTGCGACCATACTCCC   | Cj18S RNA  |

---
